# Supplementary material
Source: Springer Nature journal article supplement (https://www.springermedizin.de/resource/supplementary/12911_2006_141_MOESM2_ESM.pdf/9527216)

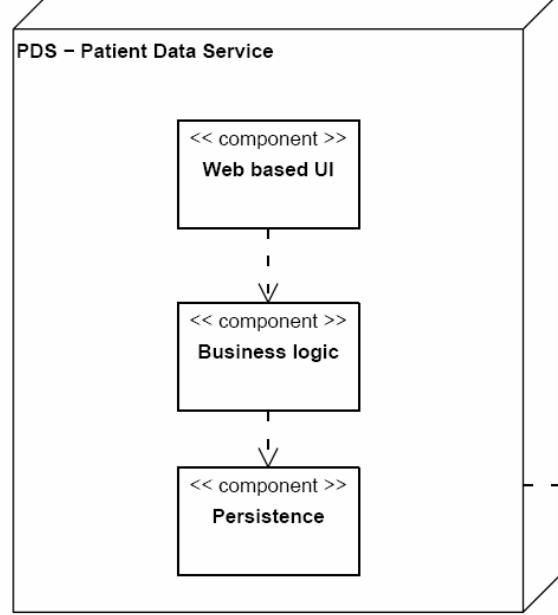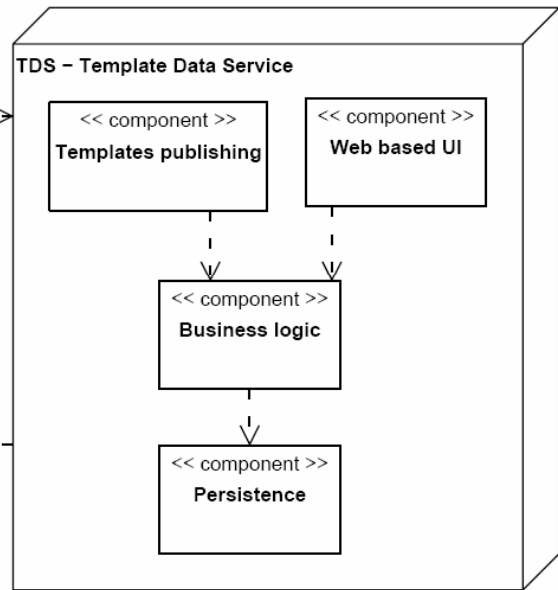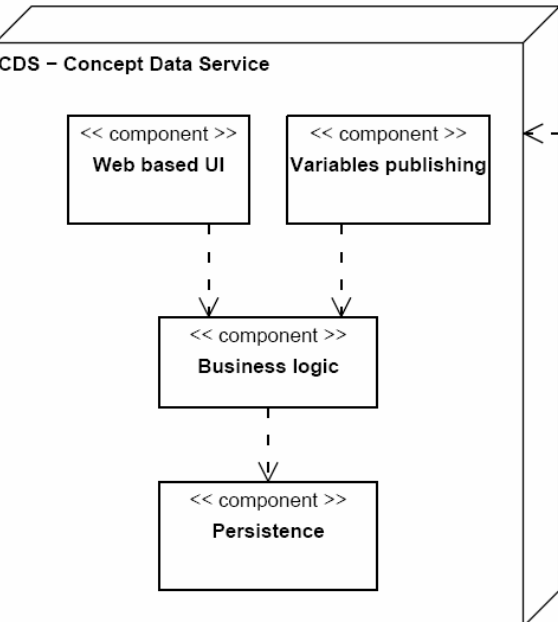

Dependency through web services

Dependency through web services

Supplement: MOESM2 [file 9527216]
